# Supplementary material for: A Meta-Analysis of the Effects of Foam Rolling on Performance and Recovery
Source: PubMed Central journal article supplement (PMC6465761; doi:10.3389/fphys.2019.00376), 2019-04-09
Supplement: Table_1.pdf [file Table_1.pdf]

Table 1. Characteristics of the included studies on the effects of pre-rolling.

| Author and year           | Subjects (male/female)                                                                                        | FR intervention                                                                          | Targeted muscles/region                                                                 | Time between FR and post-test | Outcome measures                            | Effects                                                                |
|---------------------------|---------------------------------------------------------------------------------------------------------------|------------------------------------------------------------------------------------------|-----------------------------------------------------------------------------------------|-------------------------------|---------------------------------------------|------------------------------------------------------------------------|
| <i>Sprint Performance</i> |                                                                                                               |                                                                                          |                                                                                         |                               |                                             | <i>Weighted overall:<br/>+ 0.7% (g = 0.28)</i>                         |
| Healey et al., 2014       | 26 (13/13)<br>Healthy and recreationally active                                                               | 1 x 30 s each muscle<br>Foam roller<br>Body weight                                       | Quadriceps, hamstrings, iliotibial band, calves, latissimus dorsi, and rhomboid muscles | 0 min                         | Pro-agility test                            | Post 0 min:<br>+ 0.2% (g = 0.02)                                       |
| Mikesky et al., 2002      | 30 (7/23)<br>National Collegiate Athletic Association Division II soccer, basketball, and volleyball athletes | A total of 2 min<br>Roller massager                                                      | Gluteals, hamstrings, quadriceps, and calf muscles                                      | 0 min                         | Flying-start 20-yard dash                   | Post 0 min:<br>+ 0.7% (g = 0.66)                                       |
| Peacock et al., 2014      | 11 (11/0)<br>Healthy, athletic, and physically active                                                         | 1 x 30 s each region<br>Foam roller<br>Body weight                                       | Thoracic/lumbar, gluteal, hamstring, calf, quadriceps/flexor, and pectoral regions      | 0 min                         | 18.3-m pro agility test<br>37-m sprint test | Post 0 min:<br>+ 3.3% (g = 0.70)                                       |
| Phillips et al., 2018     | 24 (8/16)<br>Healthy and physically active                                                                    | 1 x 5 min each muscle<br>Foam roller<br>Body weight                                      | Quadriceps and triceps surae muscle groups                                              | 0 min                         | Pro-agility test                            | Post 0 min:<br>- 0.7% (g = -0.09)                                      |
| <i>Jump Performance</i>   |                                                                                                               |                                                                                          |                                                                                         |                               |                                             | <i>Weighted overall:<br/>- 1.9% (g = 0.09)</i>                         |
| Grabow et al., (2017)     | 16 (8/8)<br>Healthy and either resistance and/or aerobically physically trained                               | 3 x 60 s<br>Roller massager<br>90 % of the participants maximum rating of perceived pain | Quadriceps muscles                                                                      | 0 min<br>10 min               | Vertical single-leg drop jump test          | Post 0 min:<br>- 3.0% (g = -0.02)<br>Post 10 min:<br>+ 1.8% (g = 0.01) |
| Healey et al., 2014       | 26 (13/13)<br>Healthy and recreationally active                                                               | 1 x 30 s each muscle<br>Foam roller<br>Body weight                                       | Quadriceps, hamstrings, iliotibial band, calves, latissimus dorsi, and rhomboid muscles | 0 min                         | Vertical counter-movement jump test         | Post 0 min:<br>+ 2.5% (g = 0.16)                                       |
| Jones et al., (2015)      | 20 (20/0)<br>Healthy and recreationally active                                                                | 1 x 30 s each muscle<br>Foam roller<br>Body weight                                       | Gastrocnemii, quadriceps, hamstrings, and glutei muscles                                | 0 min                         | Vertical jump test                          | Post 0 min:<br>- 0.3% (g = -0.02)                                      |

Table 1. Continued.

| Author and year             | Subjects (male/female)                                                                                        | FR intervention                                                                         | Targeted muscles/region                                                            | Time between FR and post-test                | Outcome measures                                                         | Effects                                                                                                                                                                                  |
|-----------------------------|---------------------------------------------------------------------------------------------------------------|-----------------------------------------------------------------------------------------|------------------------------------------------------------------------------------|----------------------------------------------|--------------------------------------------------------------------------|------------------------------------------------------------------------------------------------------------------------------------------------------------------------------------------|
| Mikesky et al., 2002        | 30 (7/23)<br>National Collegiate Athletic Association Division II soccer, basketball, and volleyball athletes | A total of 2 min<br>Roller massager                                                     | Gluteals, hamstrings, quadriceps, and calf muscles                                 | 0 min                                        | Vertical counter-movement jump test                                      | Post 0 min:<br>+ 1.0% (g = 0.36)                                                                                                                                                         |
| Peacock et al., 2014        | 11 (11/0)<br>Healthy, athletic, and physically active                                                         | 1 x 30 s each region<br>Foam roller<br>Body weight                                      | Thoracic/lumbar, gluteal, hamstring, calf, quadriceps/flexor, and pectoral regions | 0 min                                        | Vertical counter-movement jump test<br>Standing long jump test           | Post 0 min:<br>+ 4.9% (g = 0.43)                                                                                                                                                         |
| Phillips et al., 2018       | 24 (8/16)<br>Healthy and physically active                                                                    | 1 x 5 min each muscle<br>Foam roller<br>Body weight                                     | Quadriceps and triceps surae muscle groups                                         | 0 min                                        | Vertical counter-movement jump test                                      | Post 0 min:<br>- 2.6% (g = -0.13)                                                                                                                                                        |
| Sagiroglu et al., 2017      | 16 (16/0)<br>Well-trained combat athletes, who were competing in Judo, Karate, Tae Kwon Do, and Muay Thai     | 2 x 30 s each muscle<br>Foam roller<br>Body weight                                      | Hamstrings, quadriceps, hip, and gastrocnemius muscles                             | 0 min<br>5 min<br>10 min<br>15 min<br>30 min | Vertical counter-movement jump test                                      | Post 0 min:<br>- 4.2% (g = -0.50)<br>Post 5 min:<br>- 3.7% (g = -0.44)<br>Post 10 min:<br>- 0.2% (g = -0.03)<br>Post 15 min:<br>- 0.5% (g = -0.06)<br>Post 30 min:<br>- 1.1% (g = -0.14) |
| <i>Strength Performance</i> |                                                                                                               |                                                                                         |                                                                                    |                                              |                                                                          | <i>Weighted Overall:<br/>+ 1.8% (g = 0.12)</i>                                                                                                                                           |
| Cavanaugh et al., 2017      | 12 (12/0)<br>Healthy and recreationally active                                                                | 3 x 30 s<br>Roller massager<br>7 on a visual analog pain scale of 1 to 10               | Gastrocnemius muscle                                                               | 0 min<br>5 min                               | Maximum isometric voluntary force of the plantar flexors                 | Post 0 min:<br>- 0.8% (g = -0.04)<br>Post 5 min:<br>- 3.6% (g = -0.19)                                                                                                                   |
| Grabow et al., 2017         | 16 (8/8)<br>Healthy and either resistance and/or aerobically physically trained                               | 3 x 60 s<br>Roller massager<br>90% of the participants maximum rating of perceived pain | Quadriceps muscles                                                                 | 0 min<br>10 min                              | Maximum isometric voluntary force of the knee extensors and knee flexors | Post 0 min:<br>- 4.7% (g = -0.04)<br>Post 10 min:<br>+ 2.8% (g = 0.04)                                                                                                                   |

Table 1. Continued.

| Author and year            | Subjects (male/female)                                                                                        | FR intervention                                                                 | Targeted muscles/region                                                                 | Time between FR and post-test | Outcome measures                                                    | Effects                                                                        |
|----------------------------|---------------------------------------------------------------------------------------------------------------|---------------------------------------------------------------------------------|-----------------------------------------------------------------------------------------|-------------------------------|---------------------------------------------------------------------|--------------------------------------------------------------------------------|
| Healey et al., 2014        | 26 (13/13)<br>Healthy and recreationally active                                                               | 1 x 30 s each muscle<br>Foam roller<br>Body weight                              | Quadriceps, hamstrings, iliotibial band, calves, latissimus dorsi, and rhomboid muscles | 0 min                         | Maximum isometric voluntary quarter squat force                     | Post 0 min:<br>+ 3.9% ( $g = 0.13$ )                                           |
| MacDonald et al., 2013     | 11 (11/0)<br>Healthy, recreationally active, and resistance trained                                           | 2 x 1 min<br>Foam roller<br>Body weight                                         | Quadriceps muscles                                                                      | 0 min<br>10 min               | Maximum isometric voluntary force of the knee extensors             | Post 0 min:<br>+ 11.5% ( $g = 0.87$ )<br>Post 10 min:<br>+ 7.0% ( $g = 0.55$ ) |
| Mikesky et al., 2002       | 30 (7/23)<br>National Collegiate Athletic Association Division II soccer, basketball, and volleyball athletes | A total of 2 min<br>Roller massager                                             | Gluteals, hamstrings, quadriceps, and calf muscles                                      | 0 min                         | Maximum isokinetic voluntary concentric force of the knee extensors | Post 0 min:<br>+ 0.3% ( $g = 0.11$ )                                           |
| Peacock et al., 2014       | 11 (11/0)<br>Healthy, athletic, and physically active                                                         | 1 x 30 s each region<br>Foam roller<br>Body weight                              | Thoracic/lumbar, gluteal, hamstring, calf, quadriceps/flexor, and pectoral regions      | 0 min                         | Indirect 1RM bench press                                            | Post 0 min:<br>+ 3.8% ( $g = 0.18$ )                                           |
| Sullivan et al., 2013      | 17 (7/10)<br>Healthy and recreationally active                                                                | 2 x 10 s<br>Roller massager<br>13 kg using a constant pressure roller apparatus | Hamstring muscles                                                                       | 0 min                         | Maximum isometric voluntary force of the knee flexors               | Post 0 min:<br>0.0% ( $g = 0.00$ )                                             |
| <i>Overall Performance</i> |                                                                                                               |                                                                                 |                                                                                         |                               |                                                                     | <i>Weighted overall:<br/>+ 1.5% (<math>g = 0.20</math>)</i>                    |
| <i>Flexibility</i>         |                                                                                                               |                                                                                 |                                                                                         |                               |                                                                     | <i>Weighted overall:<br/>+ 4.0% (<math>g = 0.34</math>)</i>                    |
| Bushell et al., 2015       | 31 (19/12)<br>Healthy and competitive or recreational athletes                                                | 3 x 1 min<br>Foam roller<br>Body weight                                         | Quadriceps muscles                                                                      | 0 min                         | Hip joint range of motion                                           | Post 0 min:<br>+ 1.2% ( $g = 0.33$ )                                           |
| Cheatham et al., 2017      | 45 (27/18)<br>Healthy and recreationally active                                                               | 1 x 2 min<br>Foam roller                                                        | Quadriceps muscles                                                                      | 0 min                         | Knee joint range of motion                                          | Post 0 min:<br>+ 2.9% ( $g = 0.37$ )                                           |

Table 1. Continued.

| Author and year        | Subjects (male/female)                                                                                        | FR intervention                                                                          | Targeted muscles/region                                                            | Time between FR and post-test                                | Outcome measures                      | Effects                                                                                                                                                                               |
|------------------------|---------------------------------------------------------------------------------------------------------------|------------------------------------------------------------------------------------------|------------------------------------------------------------------------------------|--------------------------------------------------------------|---------------------------------------|---------------------------------------------------------------------------------------------------------------------------------------------------------------------------------------|
| Grabow et al., 2017    | 16 (8/8)<br>Healthy and either resistance and/or aerobically physically trained                               | 3 x 60 s<br>Roller massager<br>90 % of the participants maximum rating of perceived pain | Quadriceps muscles                                                                 | 0 min<br><br>10 min                                          | Knee joint range of motion            | Post 0 min:<br>+ 1.9% (g = 0.15)<br>Post 10 min:<br>+ 2.9% (g = 0.22)                                                                                                                 |
| Griefahn et al., 2017  | 38 (25/13)<br>Healthy and physically active                                                                   | 3 x 30 s each muscle<br>Foam roller<br>Body weight                                       | Gluteus maximus, erector spinae, and latissimus dorsi muscles                      | 0 min                                                        | Modified schober test                 | Post 0 min:<br>+ 0.2% (g = 0.01)                                                                                                                                                      |
| MacDonald et al., 2013 | 11 (11/0)<br>Healthy, recreationally active, and resistance trained                                           | 2 x 1 min<br>Foam roller<br>Body weight                                                  | Quadriceps muscle                                                                  | 0 min<br><br>10 min                                          | Knee joint range of motion            | Post 0 min:<br>+ 11.5% (g = 0.87)<br>Post 10 min:<br>+ 7.0% (g = 0.55)                                                                                                                |
| Mikesky et al., 2002   | 30 (7/23)<br>National Collegiate Athletic Association Division II soccer, basketball, and volleyball athletes | A total of 2 min<br>Roller massager                                                      | Gluteals, hamstrings, quadriceps, and calf muscles                                 | 0 min                                                        | Hamstring flexibility                 | Post 0 min:<br>+ 1.1% (g = 0.49=)                                                                                                                                                     |
| Murray et al., 2016    | 12 (12/0)<br>Squash players from an elite                                                                     | 1 x 60 s<br>Foam roller<br>Body weight                                                   | Quadriceps muscle                                                                  | 0 min<br><br>5 min<br><br>10 min<br><br>15 min<br><br>30 min | Hip flexor and quadriceps flexibility | Post 0 min:<br>+ 0.4% (g = 0.05)<br>Post 5 min:<br>+ 1.4% (g = 0.14)<br>Post 10 min:<br>+ 1.4% (g = 0.13)<br>Post 15 min:<br>+ 1.8% (g = 0.22)<br>Post 30 min:<br>- 1.1 % (g = -0.13) |
| Peacock et al., 2014   | 11 (11/0)<br>Healthy, athletic, and physically active                                                         | 1 x 30 s each region<br>Foam roller<br>Body weight                                       | Thoracic/lumbar, gluteal, hamstring, calf, quadriceps/flexor, and pectoral regions | 0 min                                                        | Sit-and-reach test                    | Post 0 min:<br>+ 0.4% (g = 0.02)                                                                                                                                                      |
| Phillips et al., 2018  | 24 (8/16)<br>Healthy and physically active                                                                    | 1 x 5 min each muscle<br>Foam roller<br>Body weight                                      | Quadriceps and triceps surae muscle groups                                         | 0 min                                                        | Knee joint range of motion            | Post 0 min:<br>+ 19.2% (g = 0.82)                                                                                                                                                     |

Table 1. Continued.

| Author and year        | Subjects (male/female)                                                                                    | FR intervention                                    | Targeted muscles/region                                | Time between FR and post-test                | Outcome measures   | Effects                                                                                                                                                                                |
|------------------------|-----------------------------------------------------------------------------------------------------------|----------------------------------------------------|--------------------------------------------------------|----------------------------------------------|--------------------|----------------------------------------------------------------------------------------------------------------------------------------------------------------------------------------|
| Sagiroglu et al., 2017 | 16 (16/0)<br>Well-trained combat athletes, who were competing in Judo, Karate, Tae Kwon Do, and Muay Thai | 2 x 30 s each muscle<br>Foam roller<br>Body weight | Hamstrings, quadriceps, hip, and gastrocnemius muscles | 0 min<br>5 min<br>10 min<br>15 min<br>30 min | Sit-and-reach test | Post 0 min:<br>+ 5.8% (g = 0.10)<br>Post 5 min:<br>+ 3.6% (g = 0.07)<br>Post 10 min:<br>+ 0.2% (g = 0.02)<br>Post 15 min:<br>- 3.7% (g = -0.04)<br>Post 30 min:<br>- 11.5% (g = -0.17) |

FR, foam rolling; 1RM, one repetition maximum.
