# Supplementary material for: A Meta-Analysis of the Effects of Foam Rolling on Performance and Recovery
Source: PubMed Central journal article supplement (PMC6465761; doi:10.3389/fphys.2019.00376), 2019-04-09
Supplement: Table_2.pdf [file Table_2.pdf]

Table 2. Characteristics of the included studies on the effects of post-rolling.

| Author and year           | Subjects (male/female)                                      | Exercise to provoke exhaustion                                                   | FR intervention                                    | Targeted muscles/region                                                 | Time between FR and post-test       | Outcome measures           | Effects                                                                                                                                                                     |
|---------------------------|-------------------------------------------------------------|----------------------------------------------------------------------------------|----------------------------------------------------|-------------------------------------------------------------------------|-------------------------------------|----------------------------|-----------------------------------------------------------------------------------------------------------------------------------------------------------------------------|
| <i>Sprint Performance</i> |                                                             |                                                                                  |                                                    |                                                                         |                                     |                            | <i>Weighted Overall:<br/>+ 3.1% (g = 0.34)</i>                                                                                                                              |
| D'Amico and Gillis, 2017  | 37 (37/0)<br>Healthy                                        | 40 x 15 m sprints with a 5 m deceleration zone                                   | 2 x 60 s each muscle<br>Foam roller<br>Body weight | Quadriceps, hamstrings, gluteus maximus, and gastrocnemius muscles      | 0 h<br>24 h<br>48 h<br>72 h<br>96 h | T-test                     | Post 0 h:<br>+ 4.0% (g = 0.35)<br>Post 24 h:<br>+ 6.2% (g = 0.55)<br>Post 48 h:<br>+ 6.9% (g = 0.61)<br>Post 72 h:<br>+ 3.3% (g = 0.29)<br>Post 96 h:<br>+ 4.5% (g = 0.41)  |
| Pearcey et al., 2015      | 8 (8/0)<br>Healthy and moderately to very physically active | 10 sets of 10 repetitions of barbell back squats at 60% of the participant's 1RM | 2 x 45 s each Muscle<br>Foam roller<br>Body weight | Quadriceps, adductors, hamstrings, iliotibial band, and gluteus muscles | 24 h<br>48 h<br>72 h                | 30-m sprint test<br>T-test | Post 24 h:<br>- 0.4% (g = 0.09)<br>Post 48 h:<br>+ 0.2% (g = 0.00)<br>Post 72 h:<br>+ 0.9% (g = 0.27)                                                                       |
| Rey et al., 2017          | 18 (18/0)<br>Spanish professional soccer players            | Standard soccer training                                                         | 2 x 45 s each Muscle<br>Foam roller<br>Body weight | Quadriceps, hamstrings, adductors, gluteals, and gastrocnemius muscles  | 24 h                                | 10-m sprint test<br>T-test | Post 24 h:<br>+ 2.2% (g = 0.37)                                                                                                                                             |
| <i>Jump Performance</i>   |                                                             |                                                                                  |                                                    |                                                                         |                                     |                            | <i>Weighted Overall:<br/>- 0.2% (g = 0.06)</i>                                                                                                                              |
| D'Amico and Gillis, 2017  | 37 (37/0)<br>Healthy                                        | 40 x 15 m sprints with a 5 m deceleration zone                                   | 2 x 60 s each muscle<br>Foam roller<br>Body weight | Quadriceps, hamstrings, gluteus maximus, and gastrocnemius muscles      | 0 h<br>24 h<br>48 h<br>72 h<br>96 h | Vertical squat jump test   | Post 0 h:<br>- 1.0% (g = 0.02)<br>Post 24 h:<br>+ 1.3% (g = 0.17)<br>Post 48 h:<br>+ 1.0% (g = 0.14)<br>Post 72 h:<br>- 1.9% (g = -0.04)<br>Post 96 h:<br>- 0.8% (g = 0.02) |

Table 2. Continued.

| Author and year             | Subjects (male/female)                                                         | Exercise to provoke exhaustion                                                               | FR intervention                                                                   | Targeted muscles/region                                                                                           | Time between FR and post-test | Outcome measures                                         | Effects                                                                                                                                    |
|-----------------------------|--------------------------------------------------------------------------------|----------------------------------------------------------------------------------------------|-----------------------------------------------------------------------------------|-------------------------------------------------------------------------------------------------------------------|-------------------------------|----------------------------------------------------------|--------------------------------------------------------------------------------------------------------------------------------------------|
| Fleckenstein et al., 2017   | 30 (15/15)<br>Healthy and physically active                                    | Functional agility short-term fatigue protocol (FAST-FP)                                     | 1 x 30 s each muscle<br>Foam roller<br>7 on a visual analog pain scale of 1 to 10 | Quadriceps, hamstrings, adductors, calves, and iliotibial band muscles                                            | 5 min                         | Reactive strength index in a drop jump test              | Post 5 min:<br>- 7.1% (g = -0.28)                                                                                                          |
| Macdonald et al., 2014      | 20 (20/0)<br>Physically active and resistance trained                          | 10 sets of 10 repetitions of barbell back squats at 60% of the participant's 1RM             | 2 x 60 s each muscle<br>Foam roller<br>Body weight                                | Muscle groups of the anterior, lateral, posterior, and medial aspect of the thigh, along with the gluteal muscles | 24 h<br>48 h<br>72 h          | Vertical counter-movement jump test                      | Post 24 h:<br>+ 6.0% (g = 0.36)<br>Post 48 h:<br>+ 5.9% (g = 0.36)<br>Post 72 h:<br>0.0% (g = 0.00)                                        |
| Pearcey et al., 2015        | 8 (8/0)<br>Healthy and moderately to very physically active                    | 10 sets of 10 repetitions of barbell back squats at 60% of the participant's 1RM             | 2 x 45 s each Muscle<br>Foam roller<br>Body weight                                | Quadriceps, adductors, hamstrings, iliotibial band, and gluteus muscles                                           | 24 h<br>48 h<br>72 h          | Standing broad jump test                                 | Post 24 h:<br>+ 2.6% (g = 0.22)<br>Post 48 h:<br>+ 4.7% (g = 0.38)<br>Post 72 h:<br>+ 5.4% (g = 0.44)                                      |
| Rey et al., 2017            | 18 (18/0)<br>Spanish professional soccer players                               | Standard soccer training                                                                     | 2 x 45 s each Muscle<br>Foam roller<br>Body weight                                | Quadriceps, hamstrings, adductors, gluteals, and gastrocnemius muscles                                            | 24 h                          | Vertical counter-movement jump test                      | Post 24 h:<br>+ 2.7% (g = 0.18)                                                                                                            |
| <i>Strength Performance</i> |                                                                                |                                                                                              |                                                                                   |                                                                                                                   |                               |                                                          | <i>Weighted Overall:<br/>+ 3. % (g = 0.21)</i>                                                                                             |
| Casanova et al., 2018       | 10 (8/2)<br>Healthy athletes with occasional experience of resistance training | 5 sets of 20 repetitions of unilateral calf raises within the maximal active range of motion | 6 x 45 s<br>Roller massager                                                       | Gastrocnemius muscle                                                                                              | 1 h<br>24 h<br>48 h<br>72 h   | Maximum isometric voluntary force of the plantar flexors | Post 1 h:<br>+ 6.6% (g = 0.18)<br>Post 24 h:<br>- 1.2% (g = -0.03)<br>Post 48 h:<br>- 3.1% (g = -0.07)<br>Post 72 h:<br>- 5.4% (g = -0.13) |

Table 2. Continued.

| Author and year            | Subjects (male/female)                                                         | Exercise to provoke exhaustion                                                               | FR intervention                                                                   | Targeted muscles/region                                                                                           | Time between FR and post-test | Outcome measures                                                                         | Effects                                                                                                                                 |
|----------------------------|--------------------------------------------------------------------------------|----------------------------------------------------------------------------------------------|-----------------------------------------------------------------------------------|-------------------------------------------------------------------------------------------------------------------|-------------------------------|------------------------------------------------------------------------------------------|-----------------------------------------------------------------------------------------------------------------------------------------|
| Fleckenstein et al., 2017  | 30 (15/15)<br>Healthy and physically active                                    | Functional agility short-term fatigue protocol (FAST-FP)                                     | 1 x 30 s each muscle<br>Foam roller<br>7 on a visual analog pain scale of 1 to 10 | Quadriceps, hamstrings, adductors, calves, and iliotibial band muscles                                            | 5 min                         | Maximum isometric voluntary force of the knee extensors                                  | Post 5 min:<br>+ 9.2% (g = 0.61)                                                                                                        |
| Macdonald et al., 2014     | 20 (20/0)<br>Physically active resistance-trained                              | 10 sets of 10 repetitions of barbell back squats at 60 % of the participant's 1RM            | 2 x 60 s each muscle<br>Foam roller<br>Body weight                                | Muscle groups of the anterior, lateral, posterior, and medial aspect of the thigh, along with the gluteal muscles | 24 h<br>48 h<br>72 h          | Maximum isometric voluntary force of the knee extensors                                  | Post 24 h:<br>+ 3.0% (g = 0.05)<br>Post 48 h:<br>0.0% (g = -0.07)<br>Post 72 h:<br>- 1.0% (g = -0.13)                                   |
| Pearcey et al., 2015       | 8 (8/0)<br>Healthy and moderately to very physically active                    | 10 sets of 10 repetitions of barbell back squats at 60 % of the participant's 1RM            | 2 x 45 s each Muscle<br>Foam roller<br>Body weight                                | Quadriceps, adductors, hamstrings, iliotibial band, and gluteus muscles                                           | 24 h<br>48 h<br>72 h          | Barbell back squats at 70 % of the participant's 1RM for a maximal number of repetitions | Post 24 h:<br>+ 1. % (g = 0.04)<br>Post 48 h:<br>+ 14.1% (g = 0.37)<br>Post 72 h:<br>+ 3.7% (g = 0.10)                                  |
| Zorko et al., 2016         | 10 (9/1)<br>Recreationally active                                              | 3 sets of 15 repetitions of knee extensions at 70 % of the participant's 1 RM                | 1 x 90 s<br>Foam roller<br>Body weight                                            | Quadriceps muscle                                                                                                 | 30 min                        | Maximum isometric voluntary force of the knee extensors                                  | Post 30 min:<br>+ 4.9% (g = 0.24)                                                                                                       |
| <i>Overall Performance</i> |                                                                                |                                                                                              |                                                                                   |                                                                                                                   |                               |                                                                                          | <i>Weighted Overall:<br/>+ 1.9% (g = 0.19)</i>                                                                                          |
| <i>Muscle pain</i>         |                                                                                |                                                                                              |                                                                                   |                                                                                                                   |                               |                                                                                          | <i>Weighted Overall:<br/>+ 6.0% (g = 0.47)</i>                                                                                          |
| Casanova et al., 2018      | 10 (8/2)<br>Healthy athletes with occasional experience of resistance training | 5 sets of 20 repetitions of unilateral calf raises within the maximal active range of motion | 6 x 45 s<br>Roller massager                                                       | Gastrocnemius muscle                                                                                              | 1 h<br>24 h<br>48 h<br>72 h   | Pressure-pain threshold                                                                  | Post 1 h:<br>+ 7.2% (g = 0.21)<br>Post 24 h:<br>+ 0.2% (g = 0.04)<br>Post 48 h:<br>+ 6.1% (g = 0.21)<br>Post 72 h:<br>+ 9.7% (g = 0.32) |

Table 2. Continued.

| Author and year          | Subjects (male/female)                                      | Exercise to provoke exhaustion                                                    | FR intervention                                    | Targeted muscles/region                                                                                           | Time between FR and post-test | Outcome measures                       | Effects                          |
|--------------------------|-------------------------------------------------------------|-----------------------------------------------------------------------------------|----------------------------------------------------|-------------------------------------------------------------------------------------------------------------------|-------------------------------|----------------------------------------|----------------------------------|
| D'Amico and Gillis, 2017 | 37 (37/0)<br>Healthy                                        | 40 x 15 m sprints with a 5 m deceleration zone                                    | 2 x 60 s each muscle<br>Foam roller<br>Body weight | Quadriceps, hamstrings, gluteus maximus, and gastrocnemius muscles                                                | 0 h                           | General labeled magnitude scale (gLMS) | Post 0 h:<br>- 4.8% (g = -0.50)  |
|                          |                                                             |                                                                                   |                                                    |                                                                                                                   | 24 h                          |                                        | Post 24 h:<br>- 1.4% (g = -0.15) |
|                          |                                                             |                                                                                   |                                                    |                                                                                                                   | 48 h                          |                                        | Post 48 h:<br>+ 1.8% (g = 0.19)  |
|                          |                                                             |                                                                                   |                                                    |                                                                                                                   | 72 h                          |                                        | Post 72 h:<br>+ 1.2% (g = 0.12)  |
|                          |                                                             |                                                                                   |                                                    |                                                                                                                   | 96 h                          |                                        | Post 96 h:<br>- 3.0% (g = -0.31) |
| Macdonald et al., 2014   | 20 (20/0)<br>Physically active resistance-trained           | 10 sets of 10 repetitions of barbell back squats at 60 % of the participant's 1RM | 2 x 60 s each muscle<br>Foam roller<br>Body weight | Muscle groups of the anterior, lateral, posterior, and medial aspect of the thigh, along with the gluteal muscles | 24 h                          | BS-11 numerical rating scale           | Post 24 h:<br>+ 11.0% (g = 1.00) |
|                          |                                                             |                                                                                   |                                                    |                                                                                                                   | 48 h                          |                                        | Post 48 h:<br>+ 27.0% (g = 2.46) |
|                          |                                                             |                                                                                   |                                                    |                                                                                                                   | 72 h                          |                                        | Post 72 h:<br>+ 25.0% (g = 2.28) |
| Pearcey et al., 2015     | 8 (8/0)<br>Healthy and moderately to very physically active | 10 sets of 10 repetitions of barbell back squats at 60 % of the participant's 1RM | 2 x 45 s each Muscle<br>Foam roller<br>Body weight | Quadriceps, adductors, hamstrings, iliotibial band, and gluteus muscles                                           | 24 h                          | Pressure-pain threshold                | Post 24 h:<br>+ 7.6% (g = 0.28)  |
|                          |                                                             |                                                                                   |                                                    |                                                                                                                   | 48 h                          |                                        | Post 48 h:<br>+ 11.0% (g = 0.42) |
|                          |                                                             |                                                                                   |                                                    |                                                                                                                   | 72 h                          |                                        | Post 72 h:<br>+ 0.7% (g = 0.02)  |
| Rey et al., 2017         | 18 (18/0)<br>Spanish professional soccer players            | Standard soccer training                                                          | 2 x 45 s each Muscle<br>Foam roller<br>Body weight | Quadriceps, hamstrings, adductors, gluteals, and gastrocnemius muscles                                            | 24 h                          | Visual analog scale                    | Post 24 h:<br>+ 15.3% (g = 1.98) |

FR, foam rolling; 1RM, one repetition maximum.
